# Supplementary material for: DNA methylome reveals cellular origin of cell-free DNA in spent medium of human preimplantation embryos
Source: JCI journal article supplement (doi:10.1172/jci146051), 2021-06-14
Supplement: sd1 [file 1]

618 **Suppl. Fig. 1. Performance of chromosome aneuploidy detection by scBS-seq.**

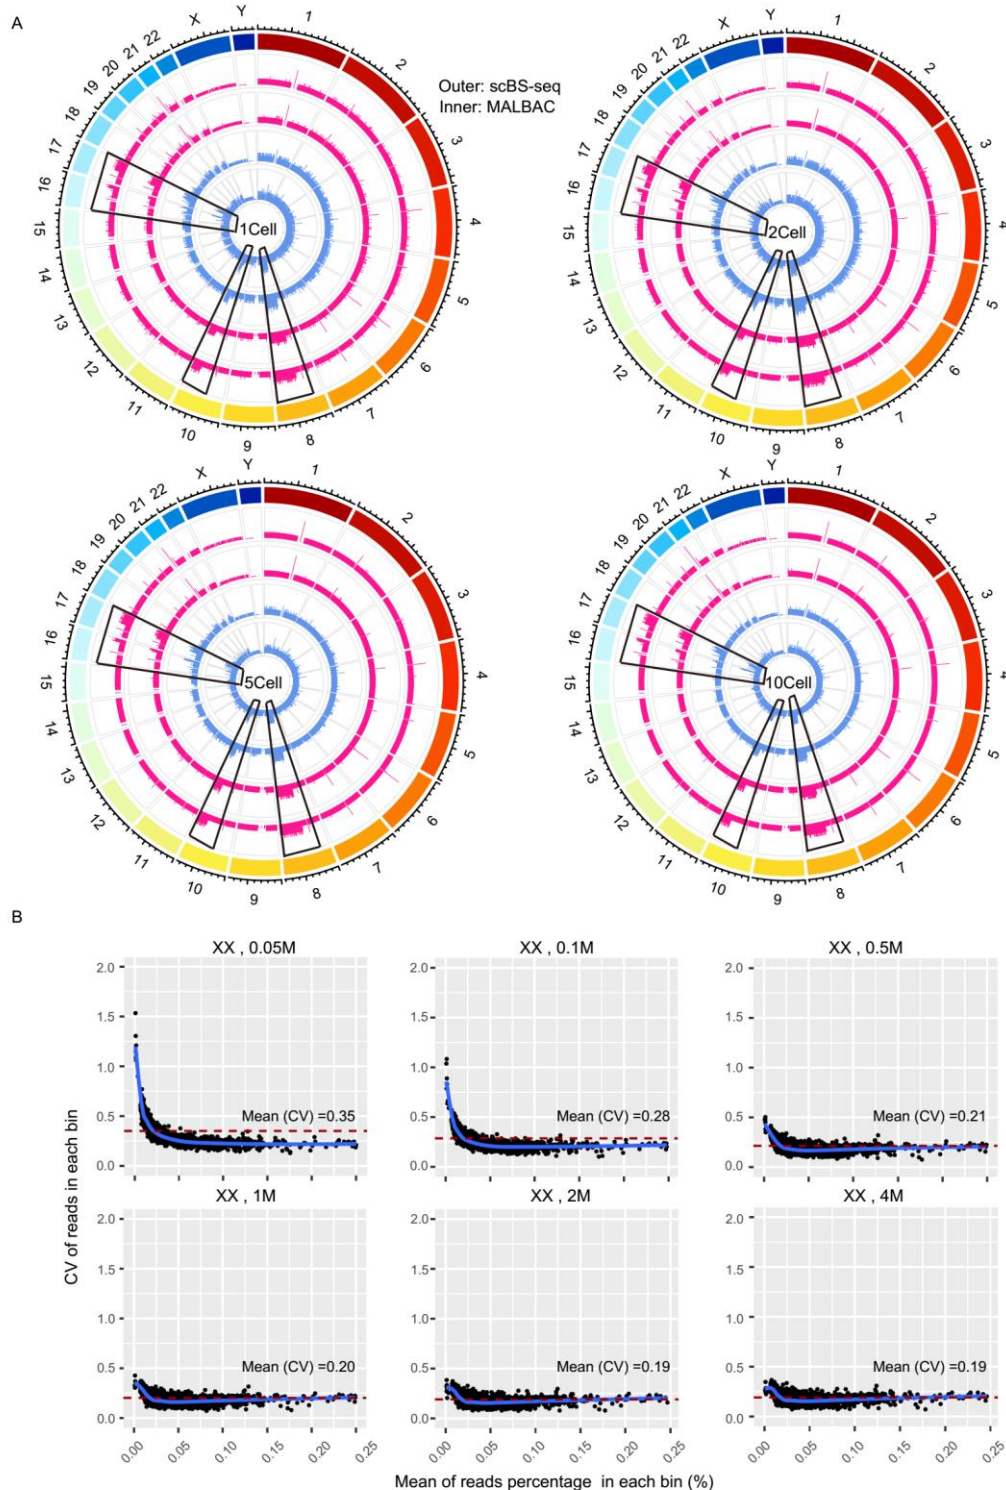

619

620 (A) Circle plots showing that the CN profiles by scBS-seq (inner) and MALBAC (outer)

621 gave the same CN patterns for HCT116 cells. (B) Distribution of CV as a function of

622 the mean of read numbers among different numbers of unique mapping reads.

623 **Suppl. Fig. 2. Classification of CN profiles by comparing SEM and TE biopsy.**

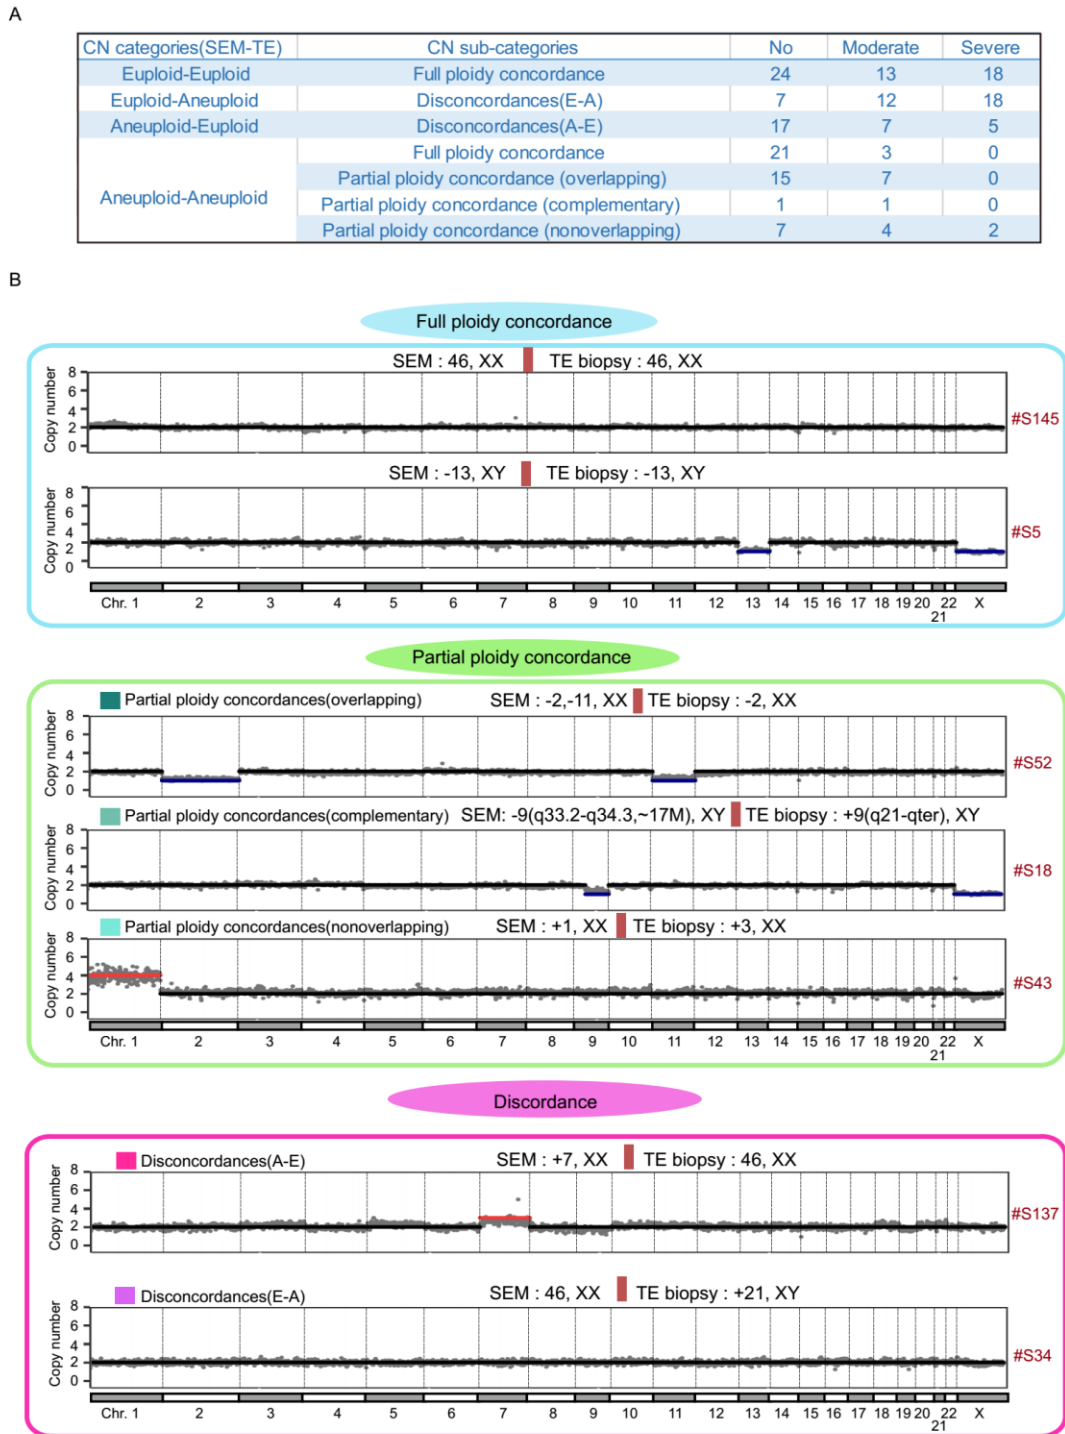

624

625 (A) The sample numbers of different CN categories and subcategories. Note that gender

626 discordance is not considered here. (B) Representative examples of chromosome CN

627 profiles in three major CN subcategories.

628 **Suppl. Fig. 3. Assessment of polar body and ICM/TE origins for SEM.**

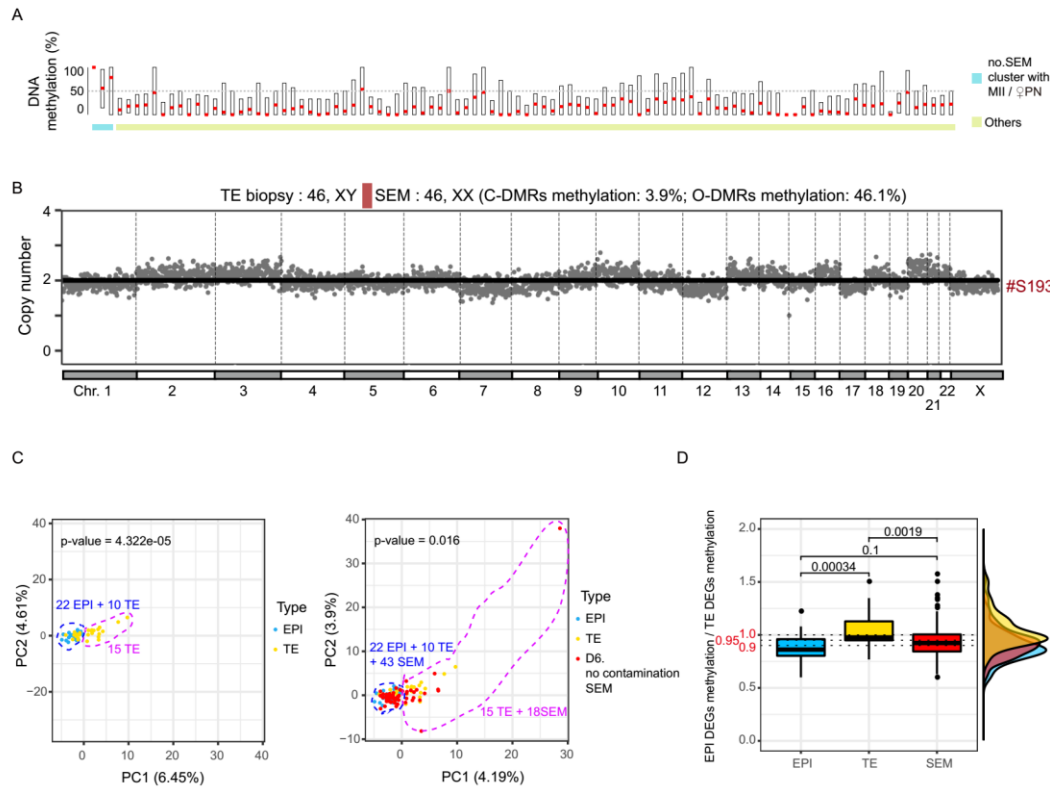

629

630 (A) DNA methylation levels of O-DMRs for three SEM samples clustered with the MII  
 631 oocytes and the female pronuclei compared with other samples. (B) The chromosome  
 632 CN profile of the SEM sample (#S193) clustered with the female pronuclei. (C) PCA  
 633 of the single-cell DNA methylation data of the EPI (n = 22) and TE (n = 25, all from  
 634 day 6 embryos) using the promoter regions of the top 300 differentially expressed genes  
 635 between the EPI and TE; the single-cell triple omics sequencing data were from our  
 636 previous study (32). A cluster of 15 TE cells (TE cluster) was separated from a cluster  
 637 of 22 EPI cells and 10 TE cells (EPI cluster). Chi square test was used for significance  
 638 test. (D) PCA of the day 6 SEM samples (with no cumulus cell or polar body  
 639 contamination) together with EPI and TE single cells. Eighteen SEMs were clustered  
 640 with the TE cluster, and 43 SEMs were clustered with the EPI cluster. Two-tailed Mann-  
 641 Whitney-Wilcoxon (MWW) test was used for significance test.

642 **Suppl. Fig. 4. Cumulus cell and polar body ratios in SEM.**

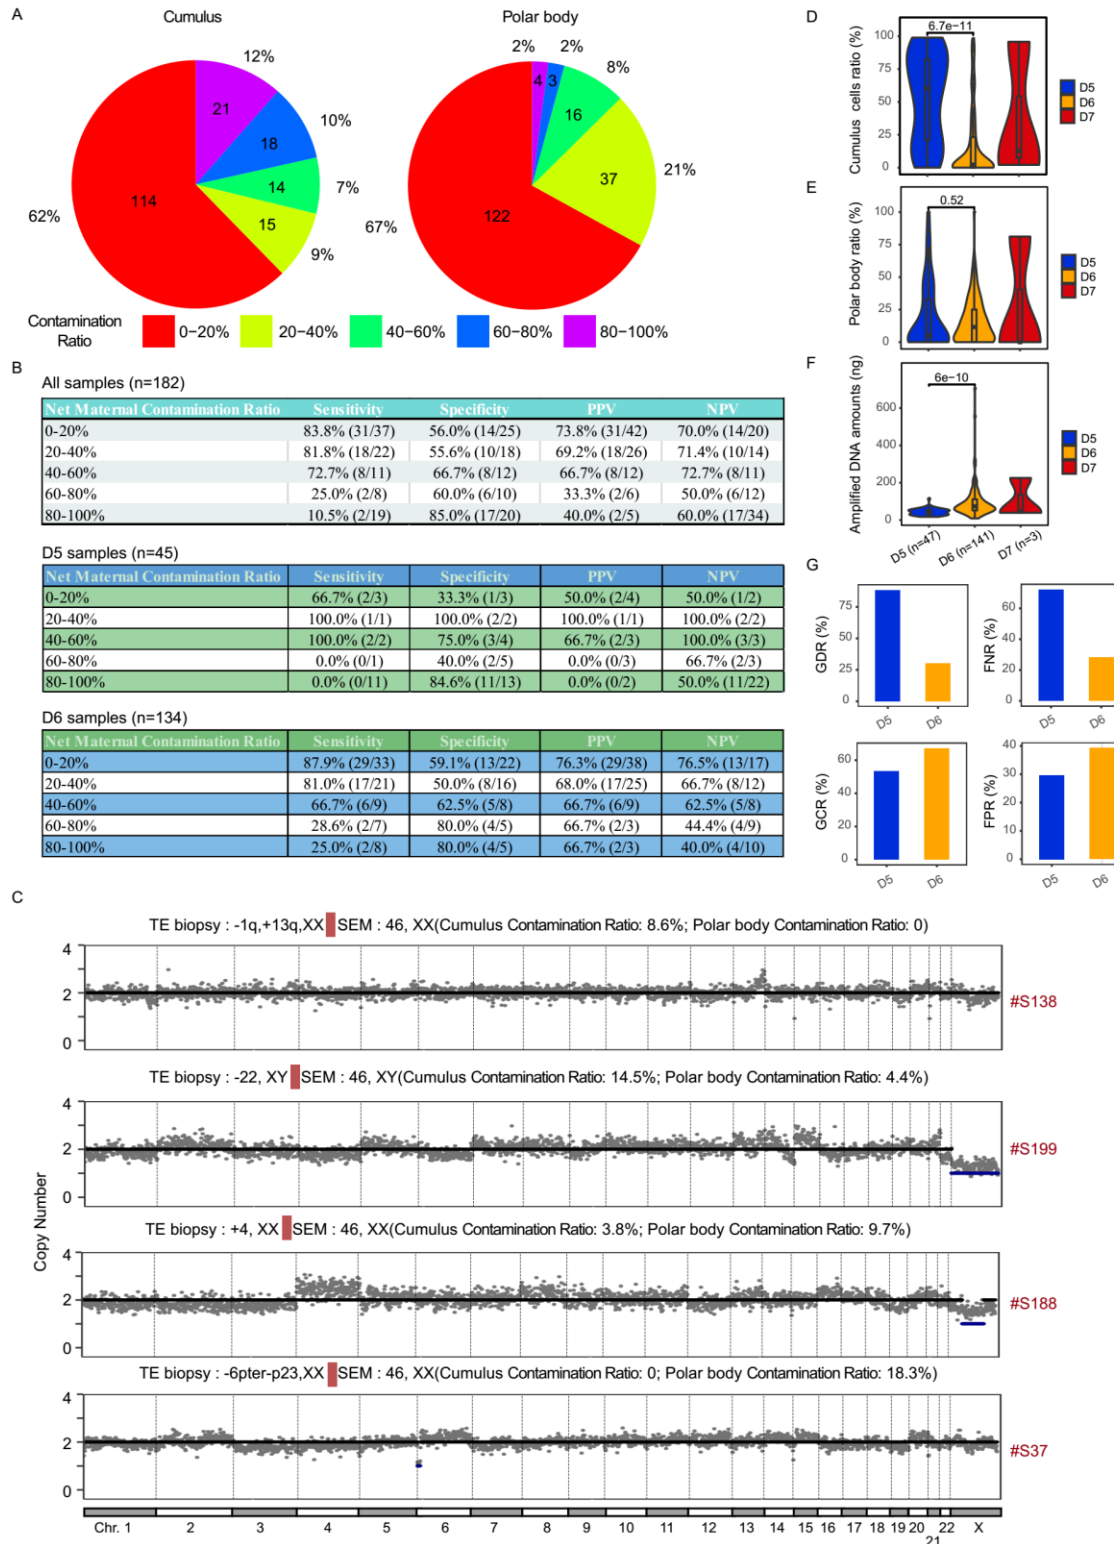

643

644 (A) Pie charts showing the numbers and percentages of the SEM samples with different

645 cumulus (left) and polar body (right) ratios. (B) Performance characteristics of SEM,

646 including sensitivity, specificity, positive and negative predictive value, taking the TE  
647 biopsy as the reference. Sensitivity = [true positives]/[true positives + false negatives];  
648 Specificity = [true negatives]/[true negatives + false positives]; positive predictive  
649 value (PPV) = [true positives]/[true positives + false positives]; negative predictive  
650 value (NPV) = [true negatives]/[true negatives + false negatives]. True positives  
651 indicated that both SEM and TE were aneuploidy; true negatives indicated that both  
652 SEM and TE were euploidy; false positives indicated that SEM was aneuploidy with  
653 TE euploidy; false negatives indicated that SEM was euploidy with TE aneuploidy. All  
654 these calculations were based on the literature of Simon's group (16). (C)  
655 Representative CN profiles for false negative SEM with nearly no maternal DNA  
656 contamination. The false negative result of the fourth case was caused by a small-  
657 segment aneuploidy of 8 Mb, which did not reach our aneuploidy calling criterion of  
658 10 Mb. The others were all caused by aneuploid and euploid cells released into the  
659 culture medium, while no euploid cells were sampled by TE biopsy. (D)- (F) Violin  
660 plots showing D) the cumulus ratios, E) the polar body ratios, and F) the amplified DNA  
661 amount in SEM samples of day 4/5 (D5), 4/6 (D6) and 4/7 (D7). Two-tailed Mann-  
662 Whitney-Wilcoxon (MWW) test was used for significance test. (G) Histograms  
663 showing the GDR, FNR, GCR and FPR of day 4/5 (D5) and day 4/6 (D6) SEM samples.

664 **Suppl. Fig. 5. Impact of maternal contamination and chromosome copy number**  
 665 **on DNA concentration in the culture medium.**

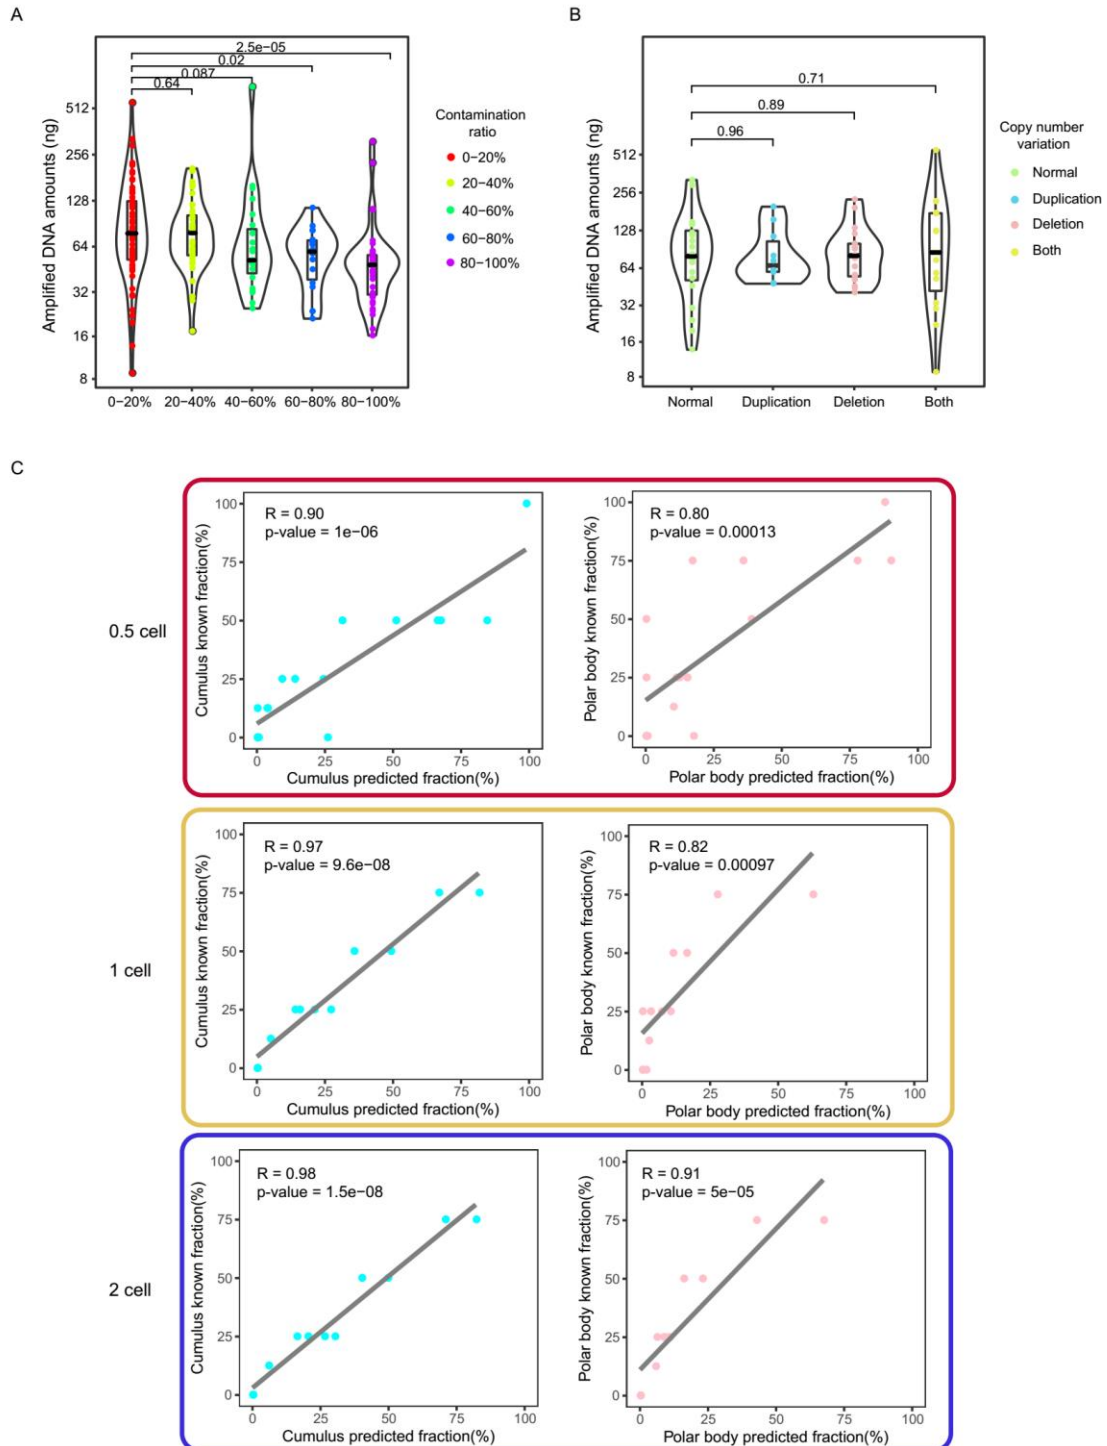

666  
 667 **(A)** Violin plot showing variations in amplified DNA amounts between different  
 668 contamination ratio samples. Two-tailed Mann-Whitney-Wilcoxon (MWW) test was  
 669 used for significance test. **(B)** Violin plot showing variations in amplified DNA amounts



670 between different chromosome copy number samples. Normal represented euploid;  
671 duplication represented copy number increase; deletion represented copy number  
672 decrease; both represented copy number increase and decrease. Two-tailed Mann-  
673 Whitney-Wilcoxon (MWW) test was used for significance test. (C) Correlations  
674 between the predicted and input component fractions of the simulated DNA mixing  
675 experiment. The red box indicated a total data volume of 0.5 cell; the yellow box  
676 indicated a total data volume of 1 cell; the blue box indicated a total data volume of 2  
677 cells. Two-tailed Mann-Whitney-Wilcoxon (MWW) test was used for significance test.

## 678 **Supplementary Tables**

### 679 **Supplementary Table 1**

680 Sample information included quality control information, copy number variations,  
681 maternal contamination, sampling time.

### 682 **Supplementary Table 2**

683 Position of O-DMRs and C-DMRs and statistics of reads mapped on O-DMRs and C-  
684 DMRs.
